# Supplementary figures and images for: Ensemble of optimised machine learning algorithms for predicting surface soil moisture content at global scale
Source: Copernicus journal article supplement (doi:10.5194/gmd-2023-83), 2023-06-08

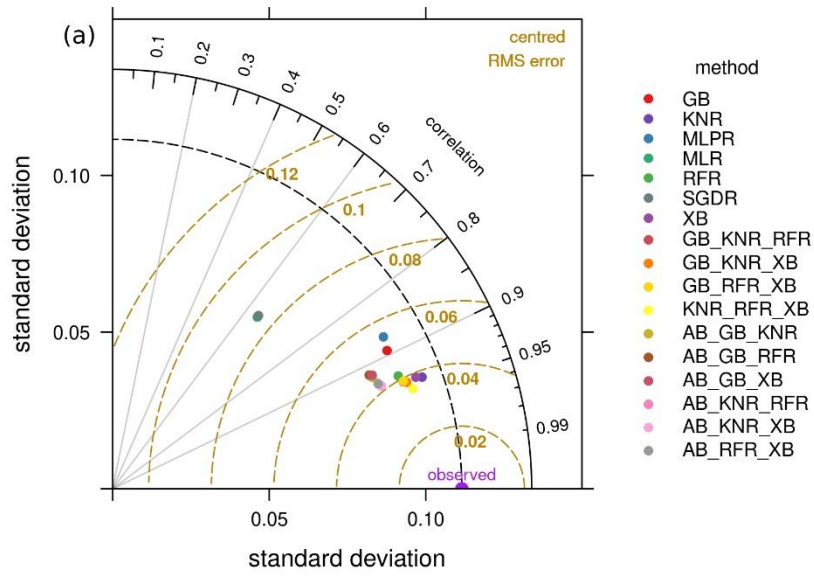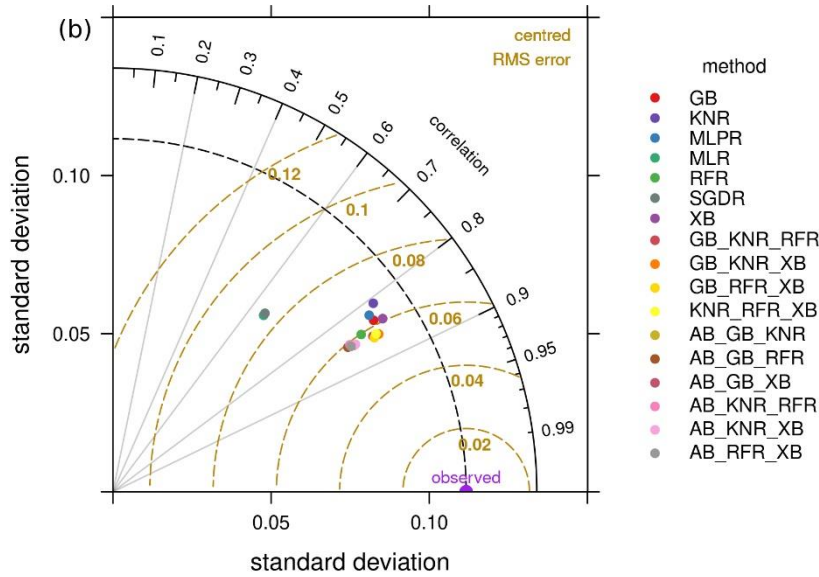

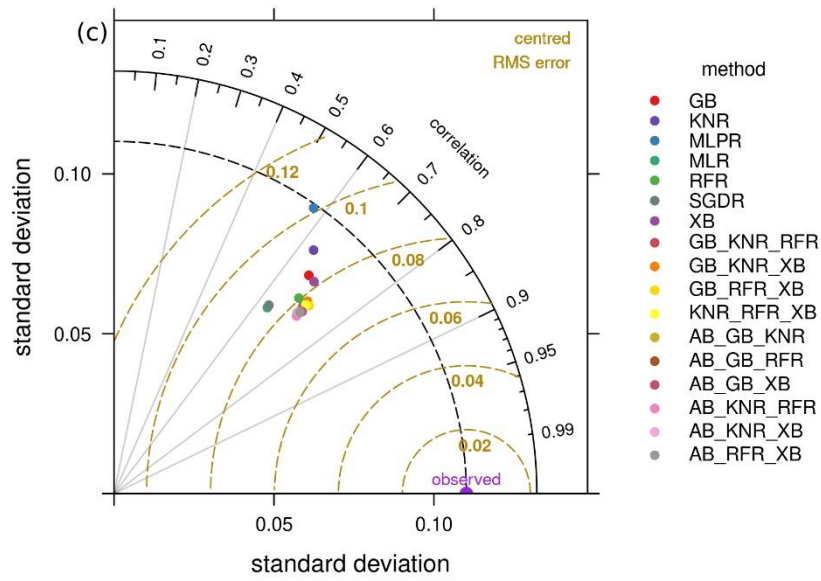

**Figure S1.** Taylor diagram on (a) “test\_random”, (b) “test\_temporal”, and (c) “test\_independent-stations”

5

Supplement: Supplementary file 1 [file gmd-2023-83-supplement.pdf]
